# Supplementary material
Source: MDPI journal article supplement (https://www.mdpi.com/2624-795X/2/4/16)
Supplement: s1 [file s1]

Archive with 4 entries (4 files):
- FigS1.pdf
- FigS2.pdf
- FigS3.pdf
- Table S1.pdf
