# Supplementary material
Source: MDPI journal article supplement (https://www.mdpi.com/2624-795X/2/4/16)
Supplement: s1 [file s1 › Table S1.pdf]

**Table S1** Post-earthquake algal cover expressed as the percentage of pre-earthquake values for 12 sites on the Kaikōura coast. Data show the minimum values recorded over three post-quake sampling campaigns during the period to 18-months post-quake in which algal mortality was occurring at variable rates. The average percentage cover of four algal classes (brown, red, corallines, green) was recorded (species by species and then grouped) in 1 m<sup>2</sup> quadrats sampled at random positions throughout the algal-dominated mid- and low intertidal zones. The total cover value can sum to > 100% due to layering and overlapping of algal species.

| Site               | Coordinates (WGS84) |             | Post-quake algal cover as percentage of pre-earthquake values (%) |     |           |       |       |
|--------------------|---------------------|-------------|-------------------------------------------------------------------|-----|-----------|-------|-------|
|                    | X                   | Y           | Brown                                                             | Red | Coralline | Green | Total |
| Oaro South         | 173.5054366         | -42.5226367 | 66                                                                | 69  | 73        | 149   | 79    |
| Oaro North         | 173.5080324         | -42.5165183 | 82                                                                | 87  | 82        | 165   | 100   |
| Shark Tooth North* | 173.6914398         | -42.4356525 | 16                                                                | 121 | 23        | 588   | 73    |
| Shark Tooth South  | 173.690683          | -42.4328186 | 6                                                                 | 24  | 9         | 275   | 52    |
| First Bay          | 173.7159516         | -42.4251374 | 38                                                                | 299 | 24        | 306   | 55    |
| Wairepo            | 173.7119037         | -42.4200986 | 5                                                                 | 41  | 7         | 100   | 10    |
| Omihi North        | 173.5250354         | -42.4885951 | 2                                                                 | 9   | 1         | 641   | 11    |
| Omihi South*       | 173.5225126         | -42.4926815 | 2                                                                 | 38  | 3         | 1482  | 17    |
| Ōkiwi North        | 173.8709615         | -42.2174891 | 6                                                                 | 134 | 38        | 709   | 39    |
| Waipapa South*     | 173.877159          | -42.2096143 | 16                                                                | 92  | 21        | 1366  | 44    |
| Waipapa Lagoon     | 173.8775657         | -42.2045148 | 2                                                                 | 7   | 1         | 359   | 3     |
| Waipapa North*     | 173.8779818         | -42.2032321 | 6                                                                 | 114 | 27        | 637   | 63    |

\*pre-earthquake algal cover estimated from nearby sites
