# Supplementary material
Source: MDPI journal article supplement (https://www.mdpi.com/2624-795X/2/4/16)

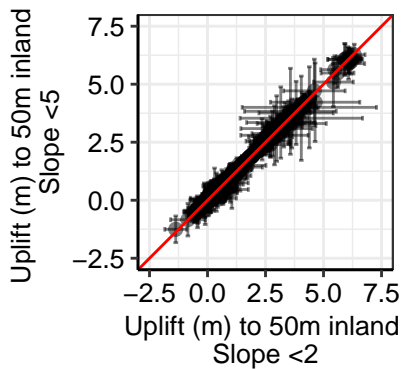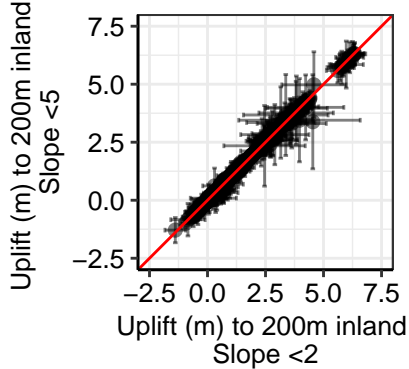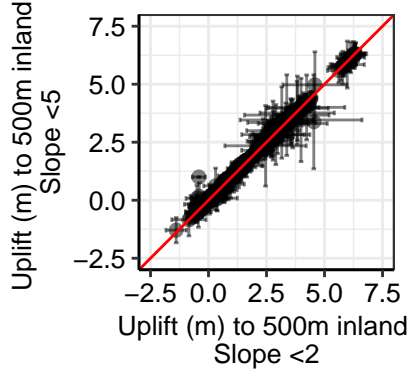

Supplement: s1 [file s1 › FigS1.pdf]

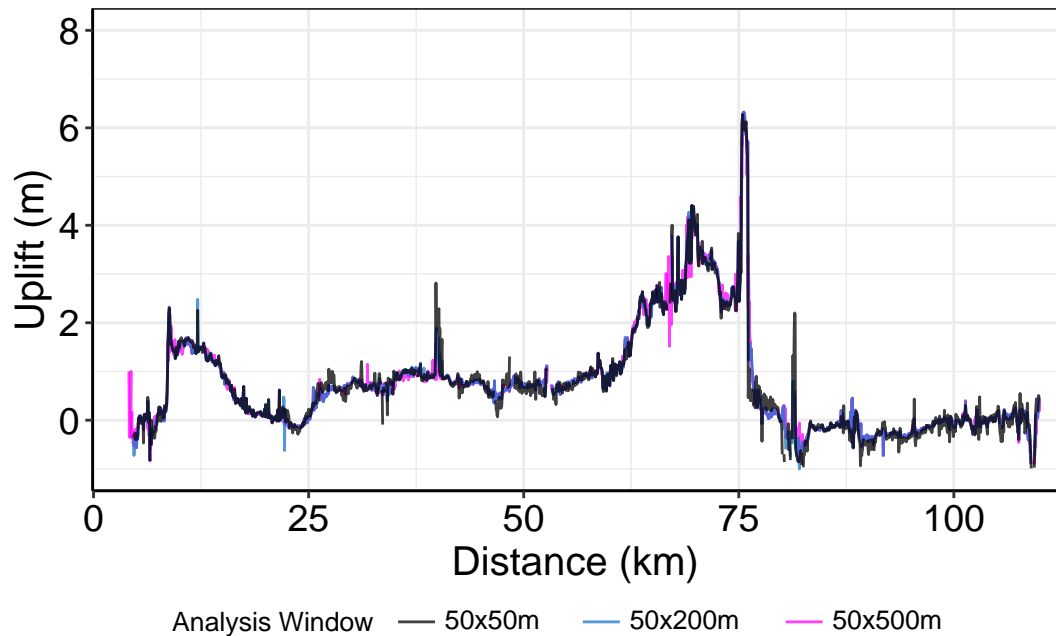

Analysis Window — 50x50m — 50x200m — 50x500m

Supplement: s1 [file s1 › FigS2.pdf]

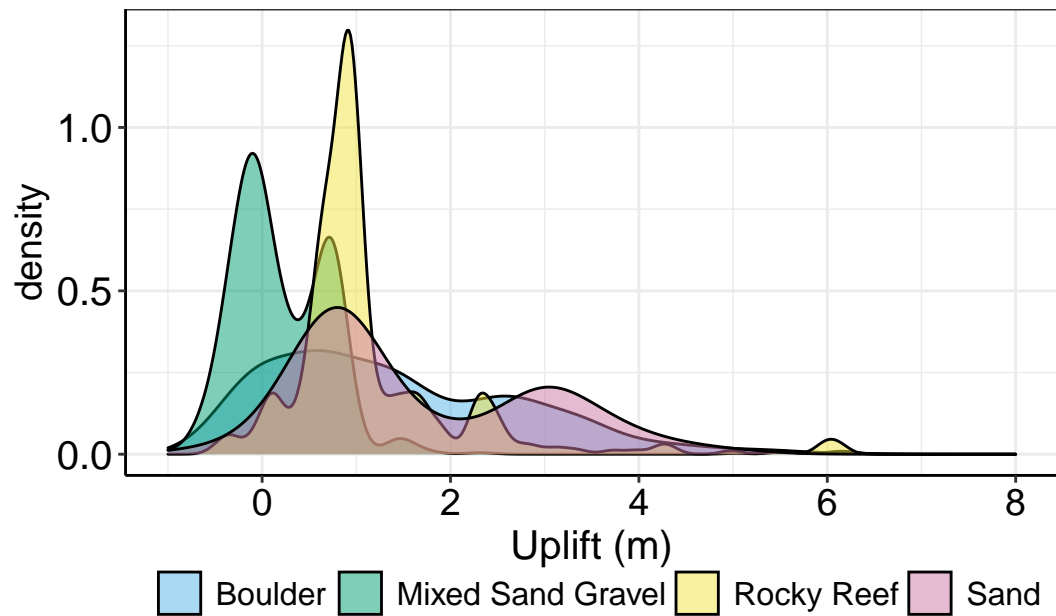

Supplement: s1 [file s1 › FigS3.pdf]
